# Supplementary material for: Flexible OLEDs with graphene electrodes on renewable cellulose platforms
Source: Royal Society of Chemistry journal article supplement (doi:10.1039/d4tc05137h), 2025-01-01
Supplement: d4tc05137h1.pdf [file d4tc05137h1.pdf]

## Electronic Supplementary Information (ESI)

### Flexible OLEDs with Graphene Electrodes on Renewable Cellulose Platforms

*Bohdan Kulyk\*, José C. Germino\*, Diana Gaspar, António J.S. Fernandes, Jonas Deuermeier, Alexandre F. Carvalho, António F. da Cunha, Luís M.N. Pereira, Luiz Pereira, Florinda M. Costa\**

This ESI contains SE-SEM images of single-layer graphene CVD samples over copper and cellulose-based flexible substrates, AFM images of CNC/PMMA/graphene electrodes, and glass and CNC-OLED under working conditions.

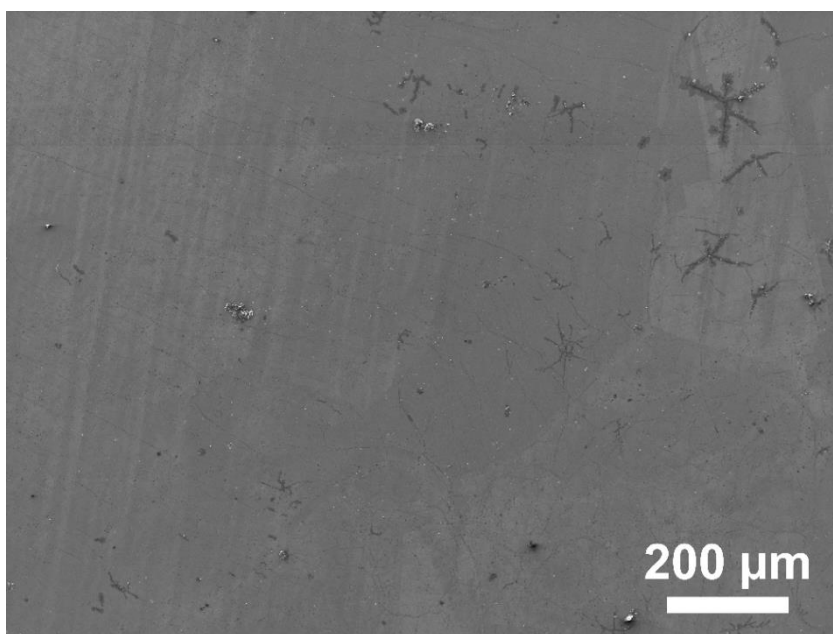

**Fig. S1.** Low magnification SE-SEM image of the single-layer graphene film on the copper substrate.

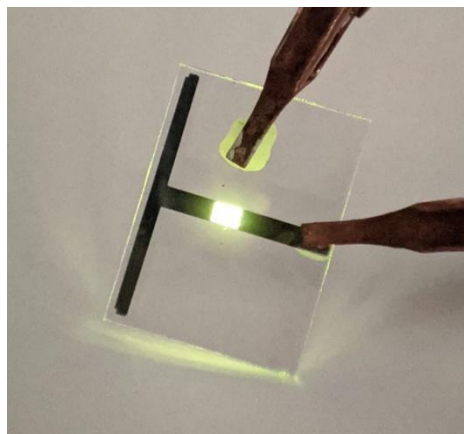

**Fig. S2.** Photograph of the quartz-supported OLED.

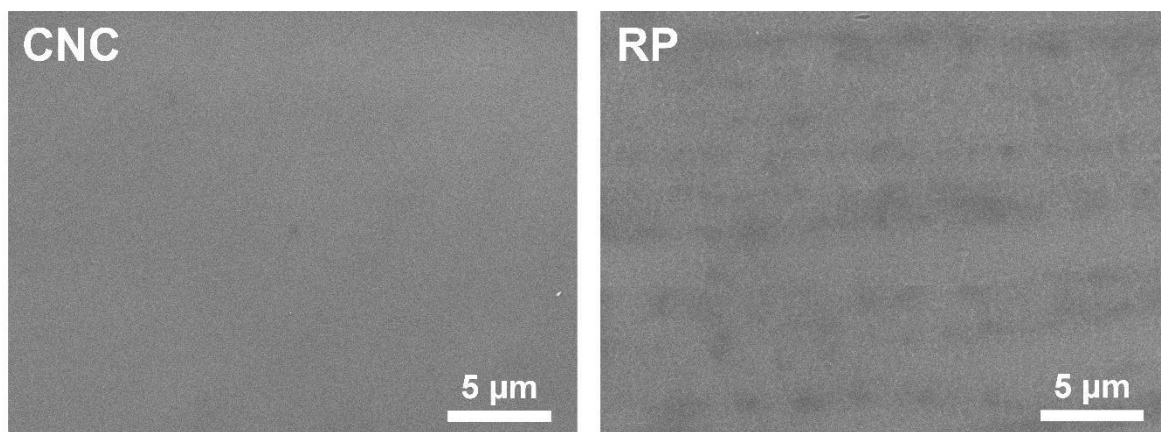

**Fig. S3.** SE-SEM images of CNC and rolling paper.

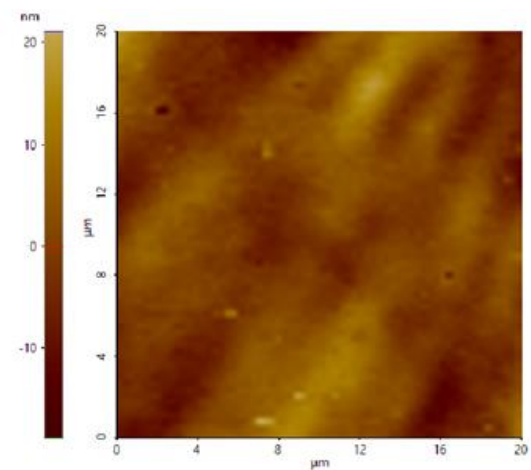

$R_q = 5.335 \text{ nm}$ ;  $R_a = 4.222 \text{ nm}$

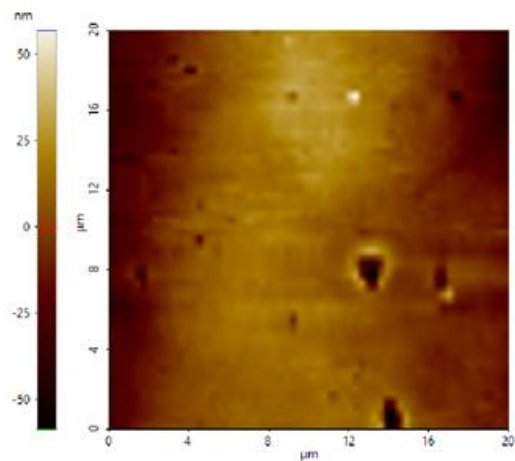

$R_q = 16.244 \text{ nm}$ ;  $R_a = 13.523 \text{ nm}$

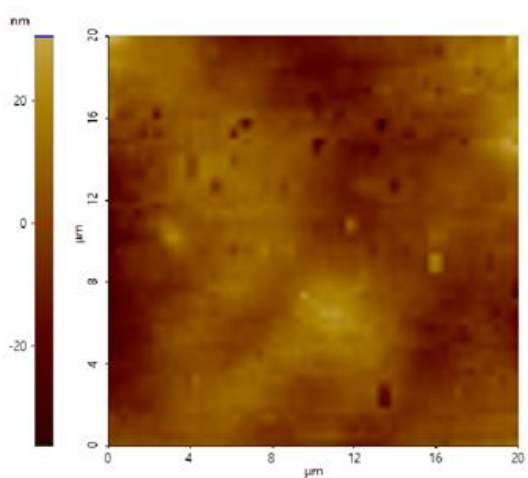

$R_q = 9.157 \text{ nm}$ ;  $R_q = 7.403 \text{ nm}$

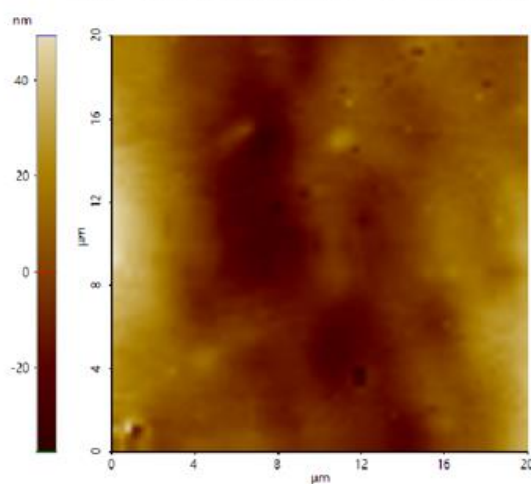

$R_q = 15.713 \text{ nm}$ ;  $R_a = 12.661 \text{ nm}$

**Fig. S4.** AFM images of CNC/PMMA/Graphene electrodes and their roughness regarding root-mean-square roughness ( $R_q$ ) and roughness average ( $R_a$ ).

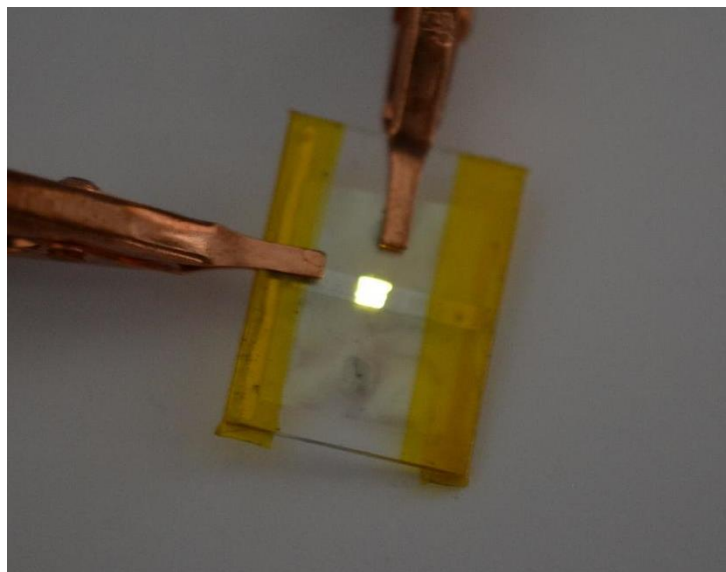

**Figure S5.** Photograph of CNC-OLED.
